# Supplementary material for: P2X4-receptor participates in EAAT3 regulation via BDNF-TrkB signaling in a model of trigeminal allodynia
Source: PubMed Central journal article supplement — Mol Pain. 2018 Aug 27;14:1744806918795930. doi: 10.1177/1744806918795930 (PMC6111400; doi:10.1177/1744806918795930), 2018-08-27
Supplement: Supplemental_Figures.pdf [file Supplemental_Figures.pdf]

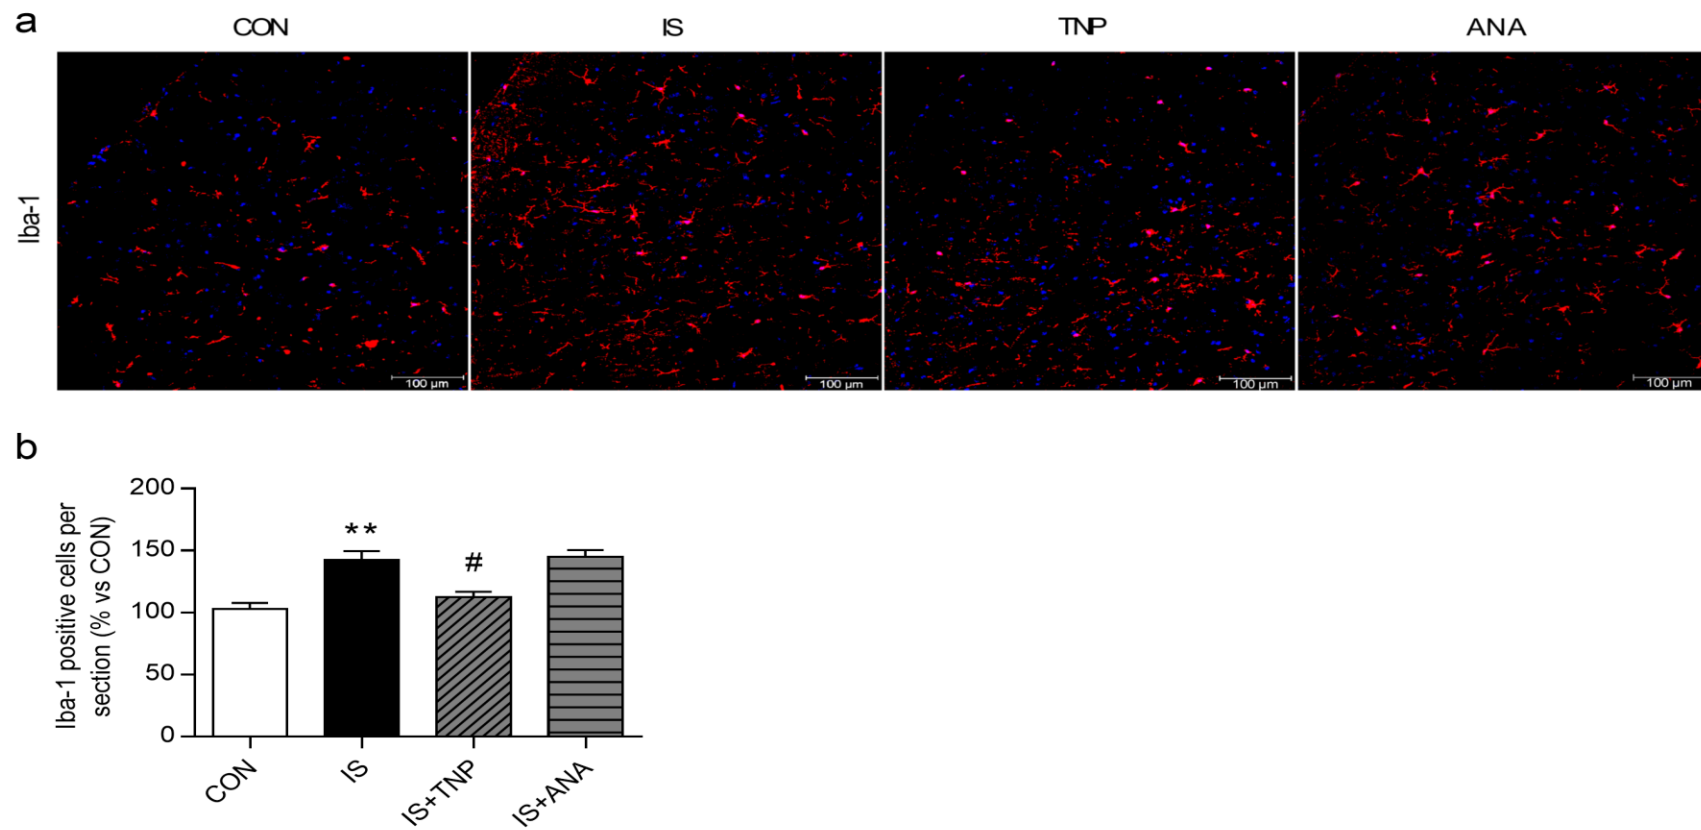

**Supplemental Figure 1.** Immunofluorescence of Iba-1 expression in the TNC. (a) Representative immunofluorescence samples of Iba-1 in the TNC in the CON, IS, IS+TNP (30nmol) and IS+ANA (100nmol) groups. Blue indicates DAPI immunoreactivity, red indicates Iba-1 immunoreactivity. (b) Histograms showed the statistical results of Iba-1 expression in TNC (a). Data represent the mean  $\pm$  SEM. Statistical analyses were performed by one-way ANOVA, followed by a Tukey test; \*\* $P$ <0.01 vs. CON, # $P$ <0.05 vs. IS (n=3 per group). IS, inflammatory soup; TNP, TNP-ATP; ANA, ANA-12.

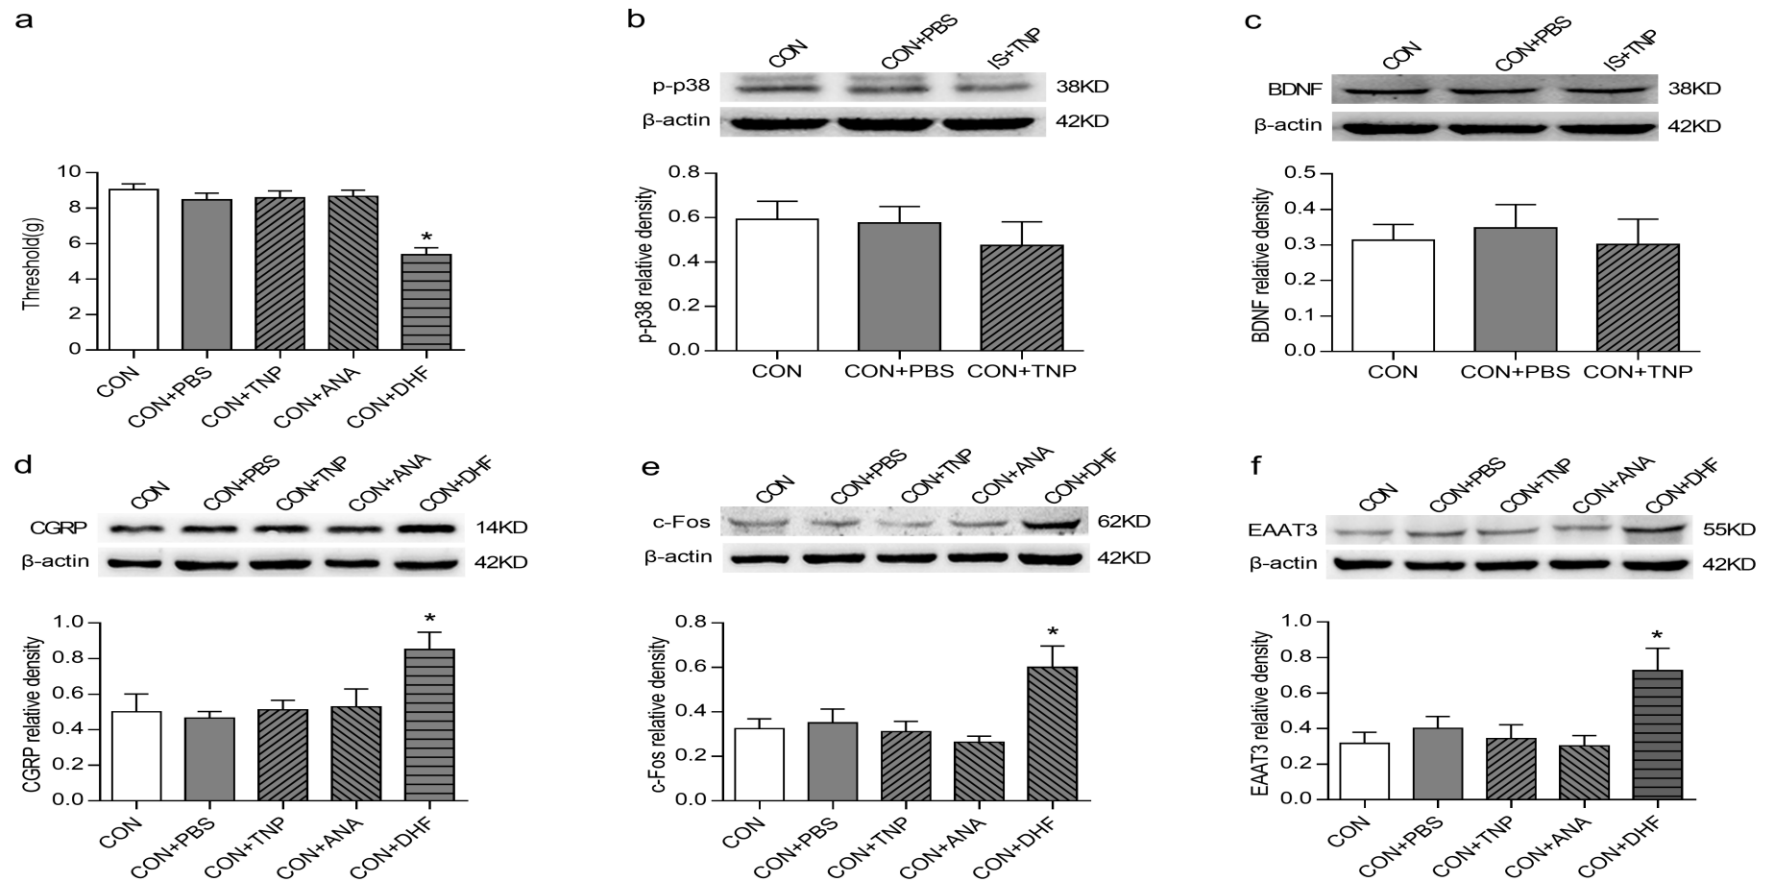

**Supplemental Figure 2.** Effect of TNP-ATP, ANA-12 and 7,8-DHF on trigeminal allodynia and p-p38, BDNF, CGRP, c-Fos, EAAT3 expression in the TNC in rats receiving repetitive dural PBS application. **(a)** TNP-ATP (30nmol) and ANA-12 (100nmol) treatment did not significantly alter the basal periorbital thresholds, while 7,8-DHF

(20nmol) obviously decreased the threshold as compared to the group of CON+PBS. **(b, c)** WB for p-p38 (b), BDNF (c) expression in the TNC (upper panel) revealed no evident difference among the three groups. Quantification (lower panel) of WB experiments was normalized to actin control. **(d-f)** WB for CGRP (d), c-Fos (e), EAAT3 (f) expression in the TNC (upper panel) revealed that TNP-ATP (30nmol) and ANA-12 (100nmol) treatment did not significantly alter their protein levels, while 7,8-DHF (20nmol) obviously increased their expression compared with the group of CON+PBS. There were no obvious difference between the group of CON and CON +PBS. Quantification (lower panel) of all WB experiments was normalized to actin control. Data represent the mean  $\pm$  SEM. Statistical analyses were performed by one-way ANOVA, followed by a Tukey test; \* $P$ <0.05 vs. CON (n=3-5 per group). WB, western blot; TNP, TNP-ATP; ANA, ANA-12; DHF, 7,8-DHF.
